# Supplementary material
Source: Springer Nature journal article supplement (https://www.springermedizin.de/resource/supplementary/12990_2008_130_MOESM1_ESM.pdf/9612628)

# Capsaicin treatment

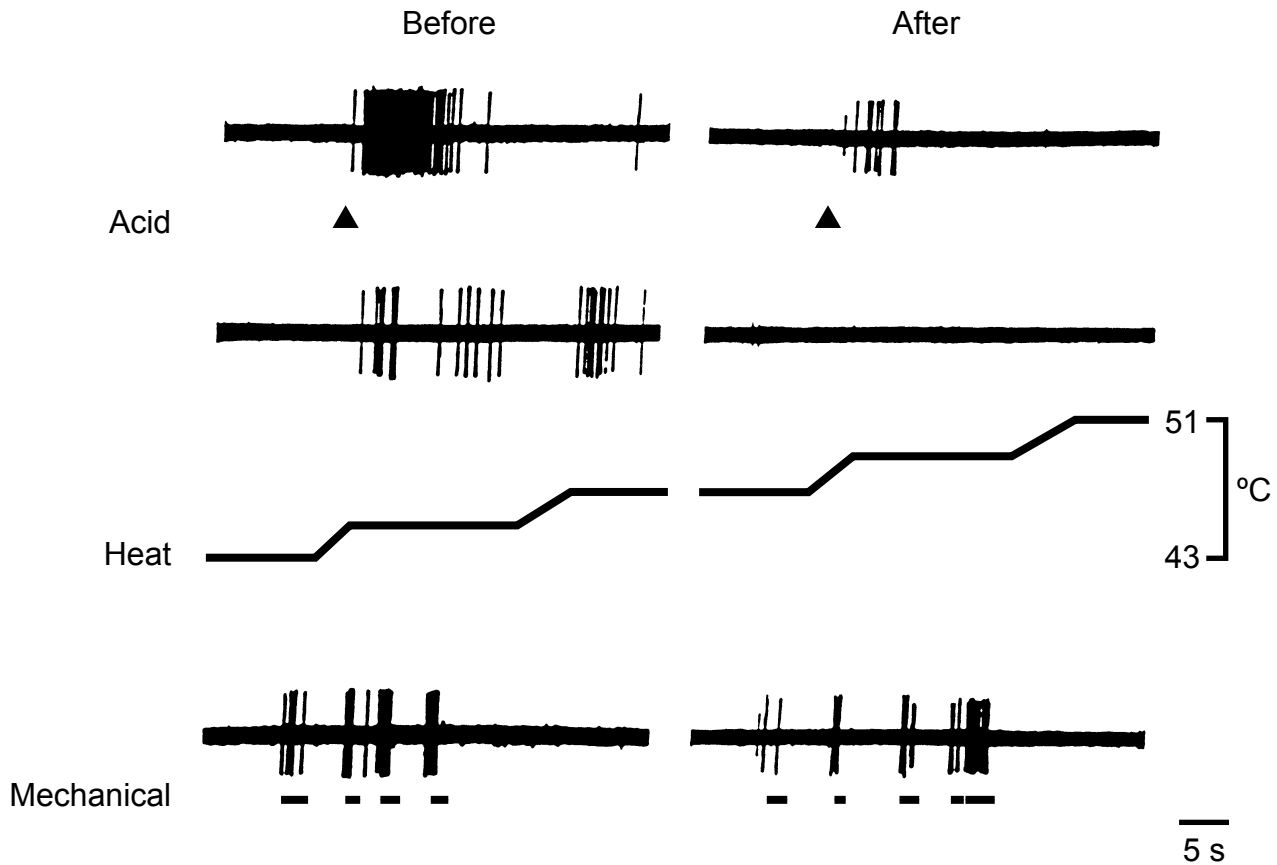

Supplement: MOESM1 [file 9612628]
